# Supplementary material for: Cell-Surface Marker Signature for Enrichment of Ventricular Cardiomyocytes Derived from Human Embryonic Stem Cells
Source: PubMed Central journal article supplement — Stem Cell Reports. 2018 Aug 16;11(3):828–41. doi: 10.1016/j.stemcr.2018.07.007 (PMC6135222; doi:10.1016/j.stemcr.2018.07.007), 2018-08-16
Supplement: mmc1.pdf [file mmc1.pdf]

**Supplemental Information**

**Cell-Surface Marker Signature for Enrichment of Ventricular Cardiomyocytes Derived from Human Embryonic Stem Cells**

**Jennifer Veevers, Elie N. Farah, Mirko Corselli, Alec D. Witty, Karina Palomares, Jason G. Vidal, Nil Emre, Christian T. Carson, Kunfu Ouyang, Canzhao Liu, Patrick van Vliet, Maggie Zhu, Jeffrey M. Hegarty, Dekker C. Deacon, Jonathan D. Grinstein, Ralf J. Dirschinger, Kelly A. Frazer, Eric D. Adler, Kirk U. Knowlton, Neil C. Chi, Jody C. Martin, Ju Chen, and Sylvia M. Evans**

## Supplemental Information

# Figure S1.

**A**

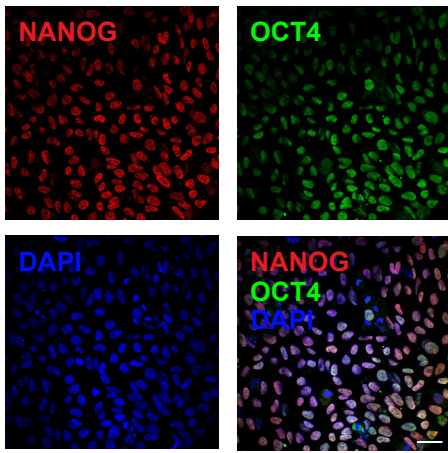

**B**

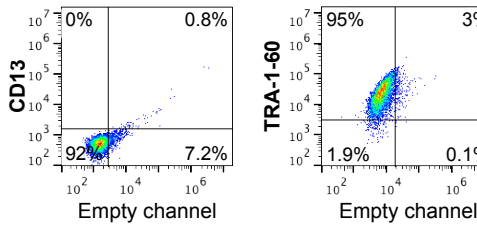

**D**

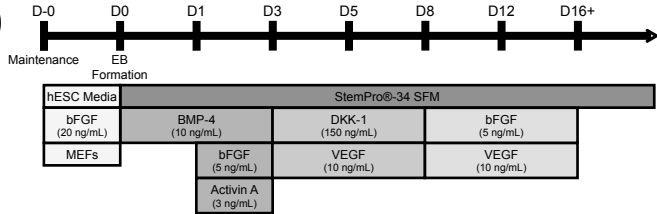

**E**

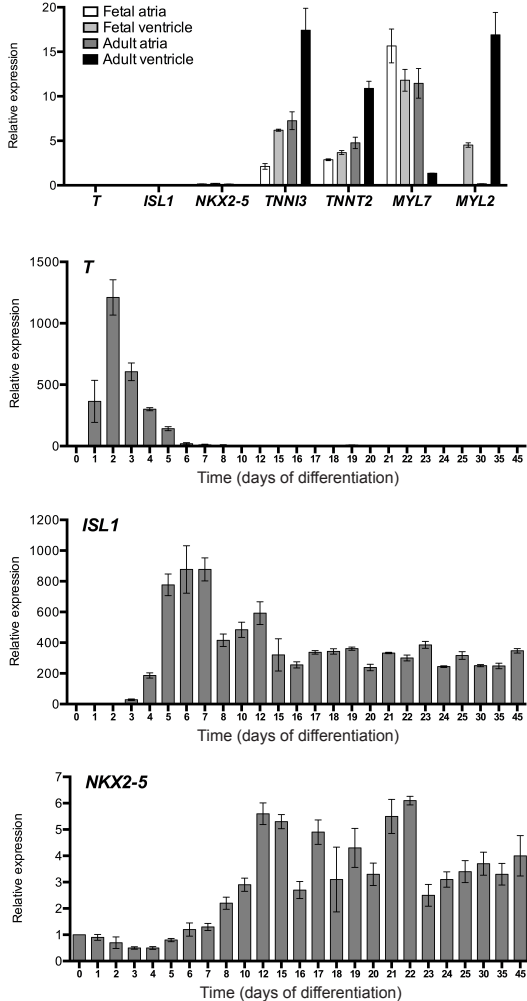

**C**

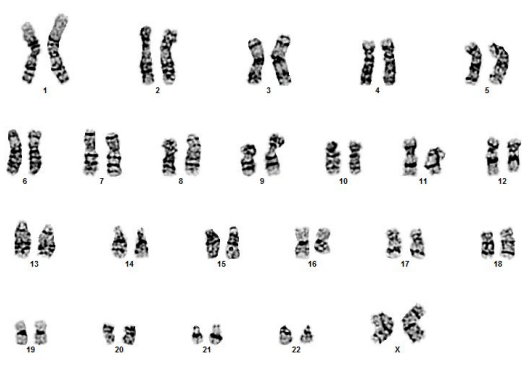

**F**

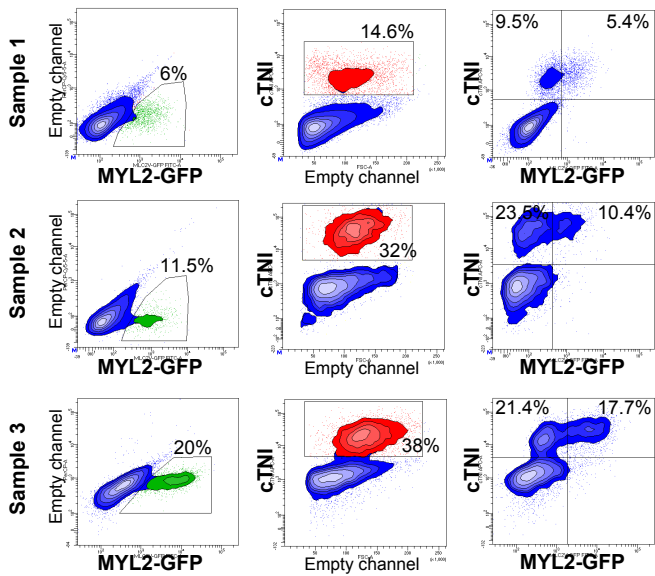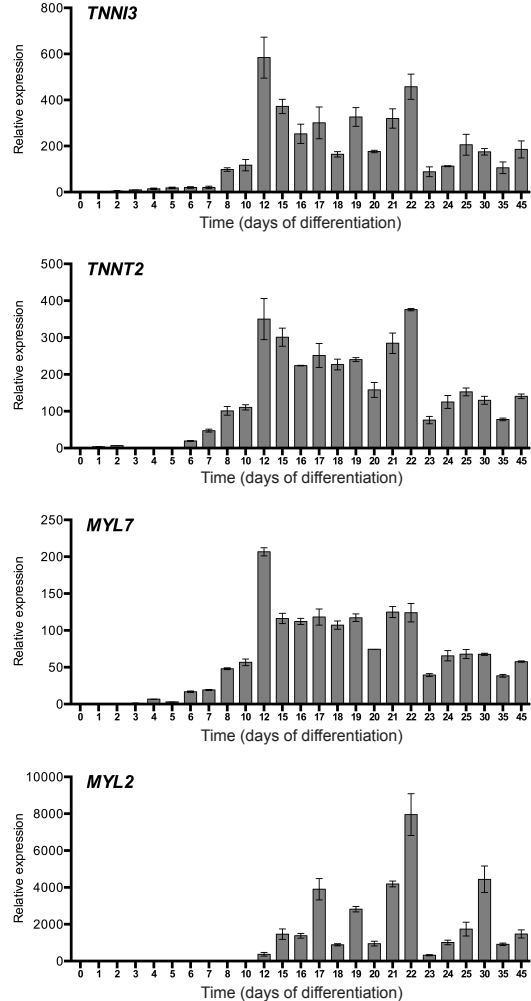

# Figure S2.

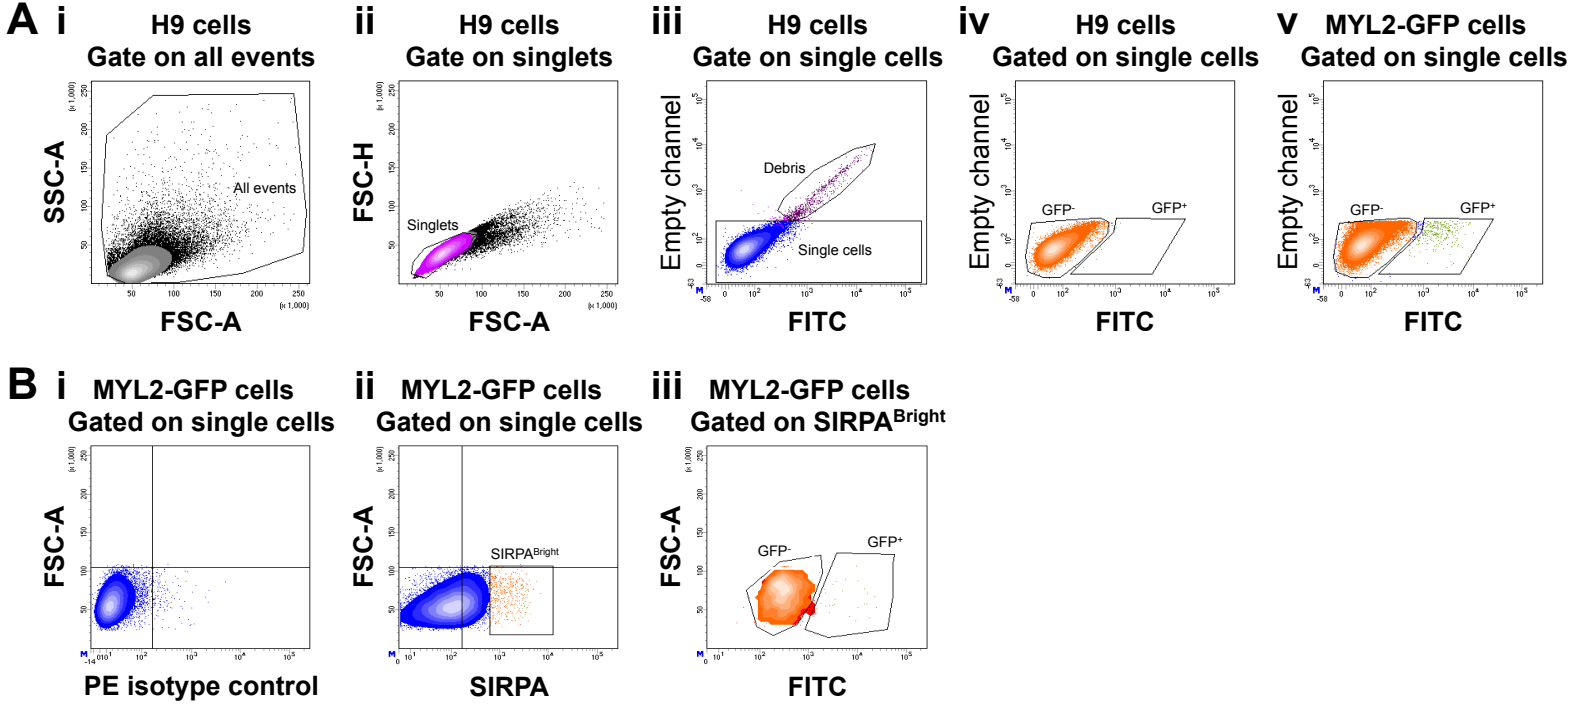

**Figure S3.**

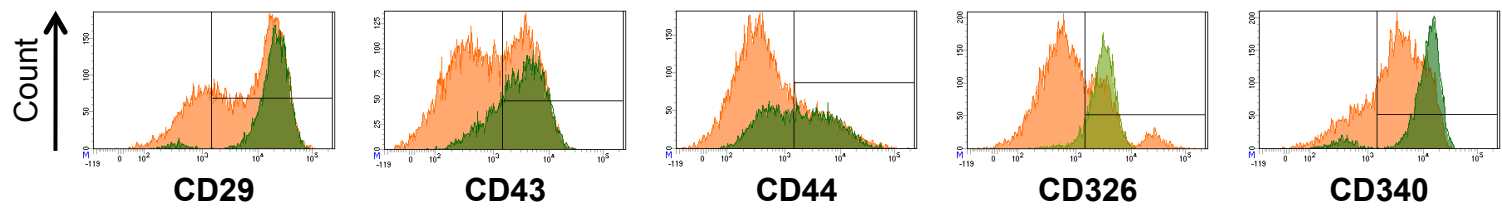

|           |       |
|-----------|-------|
| MFI ratio | 1.63  |
| GFP+      | 94.7% |
| GFP-      | 77.9% |

|           |       |
|-----------|-------|
| MFI ratio | 1.81  |
| GFP+      | 78.8% |
| GFP-      | 47.2% |

|           |       |
|-----------|-------|
| MFI ratio | 2.15  |
| GFP+      | 57.3% |
| GFP-      | 29.6% |

|           |       |
|-----------|-------|
| MFI ratio | 2.13  |
| GFP+      | 90.3% |
| GFP-      | 42.8% |

|           |       |
|-----------|-------|
| MFI ratio | 2.02  |
| GFP+      | 90.6% |
| GFP-      | 78.6% |

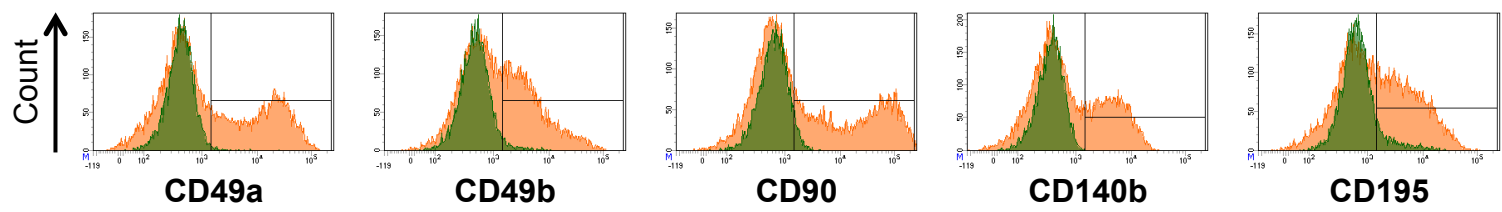

|           |       |
|-----------|-------|
| MFI ratio | 0.39  |
| GFP+      | 7.8%  |
| GFP-      | 43.2% |

|           |       |
|-----------|-------|
| MFI ratio | 0.32  |
| GFP+      | 13.3% |
| GFP-      | 48.3% |

|           |       |
|-----------|-------|
| MFI ratio | 0.37  |
| GFP+      | 18.5% |
| GFP-      | 50.7% |

|           |       |
|-----------|-------|
| MFI ratio | 0.46  |
| GFP+      | 5.6%  |
| GFP-      | 35.8% |

|           |       |
|-----------|-------|
| MFI ratio | 0.36  |
| GFP+      | 22.8% |
| GFP-      | 51.7% |

**Figure S4.**

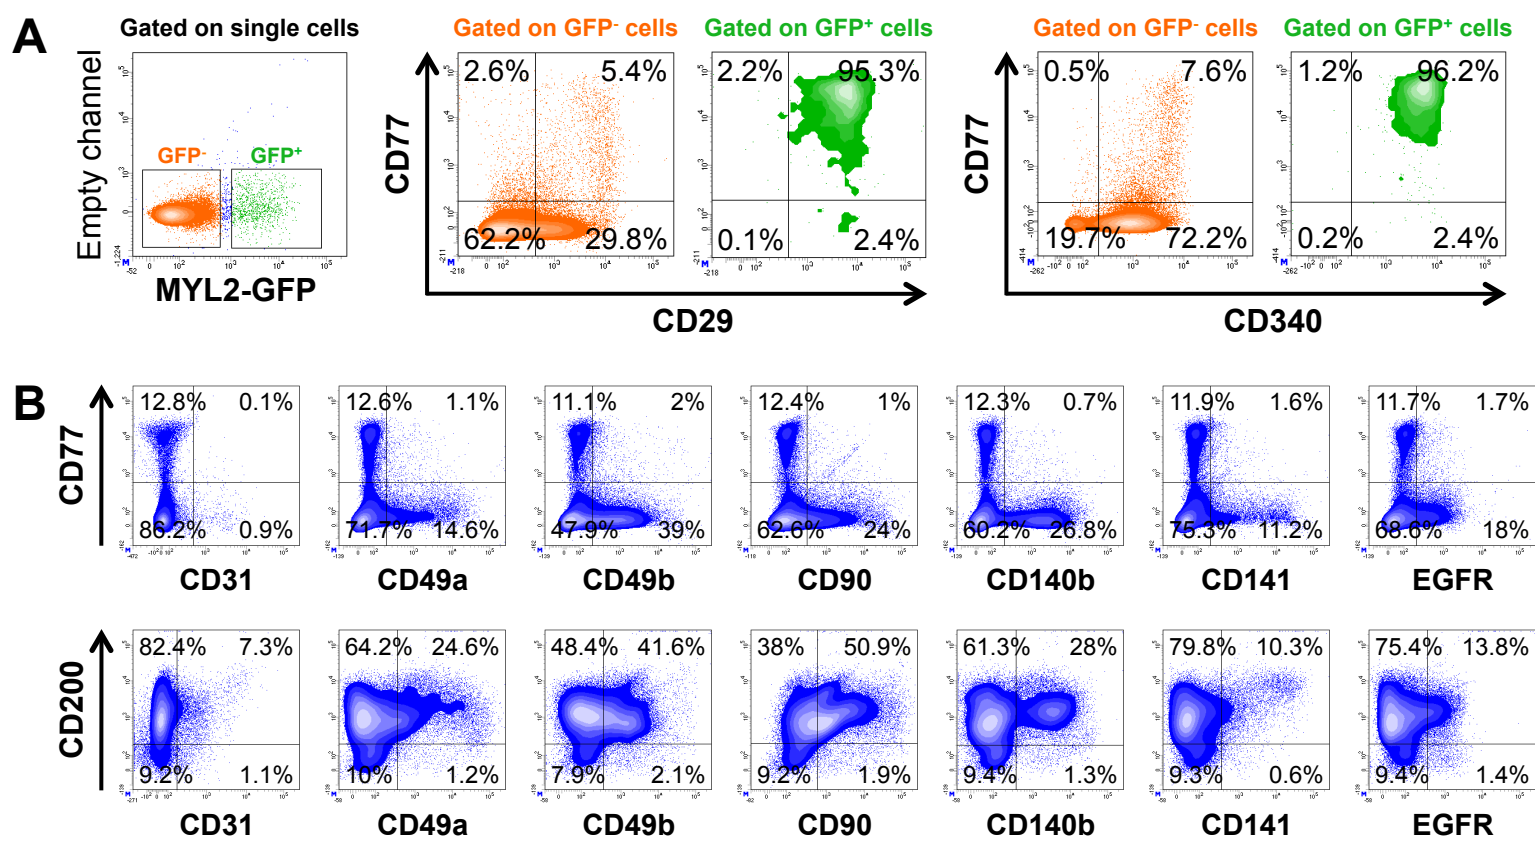

**Figure S5.**

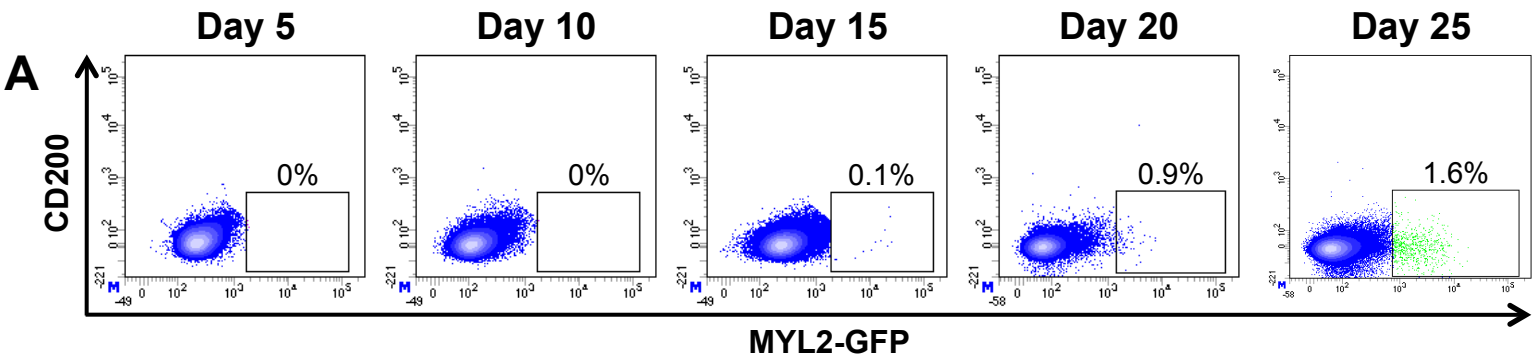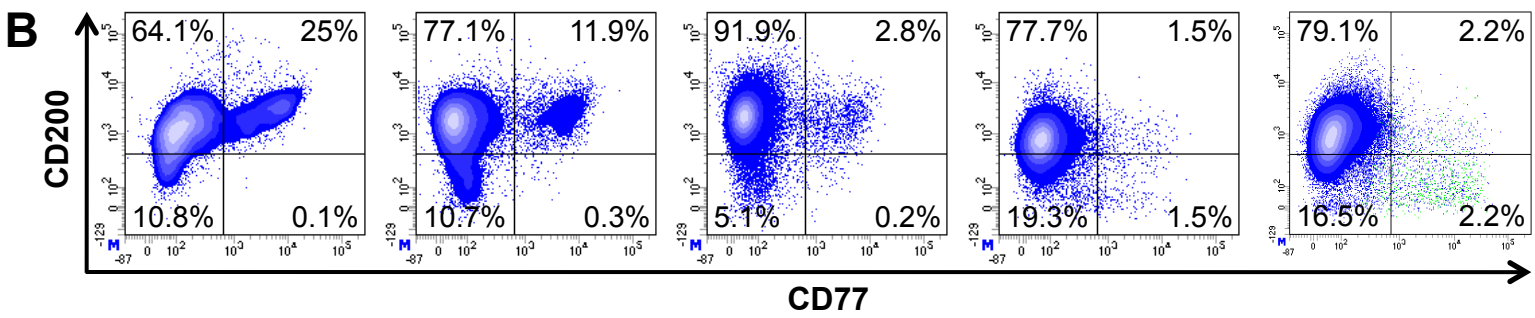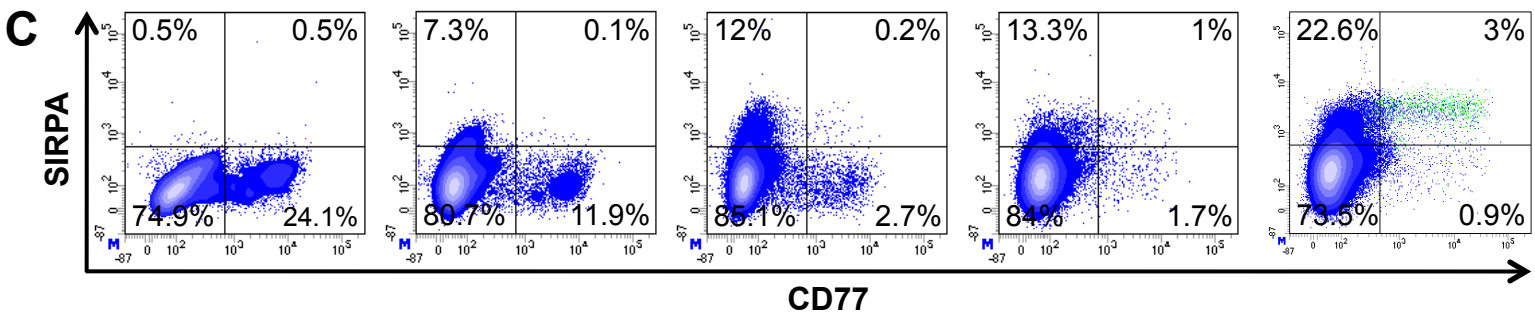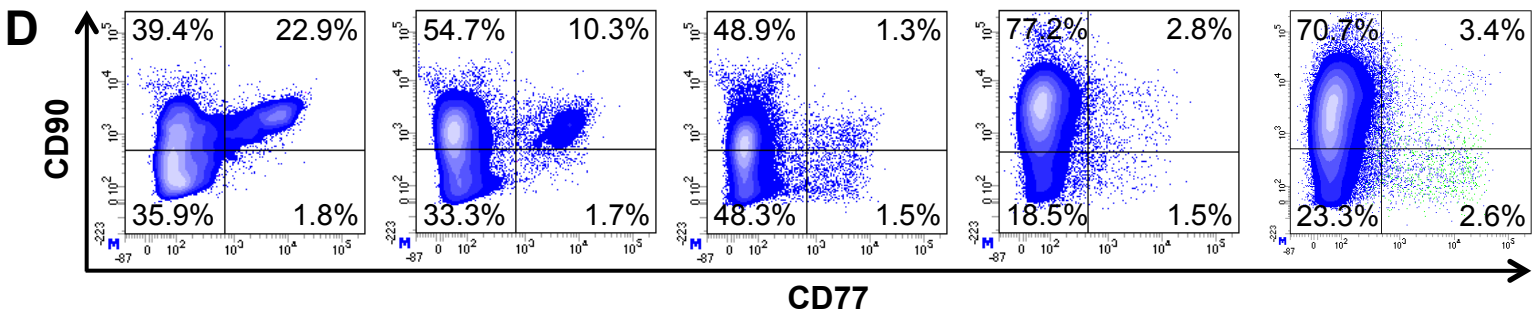

**E** Gated on VCAM1<sup>+</sup> cells - Day 12

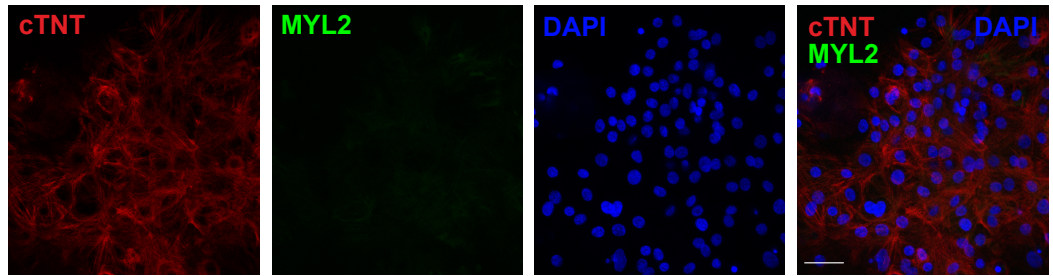

**Figure S6.**

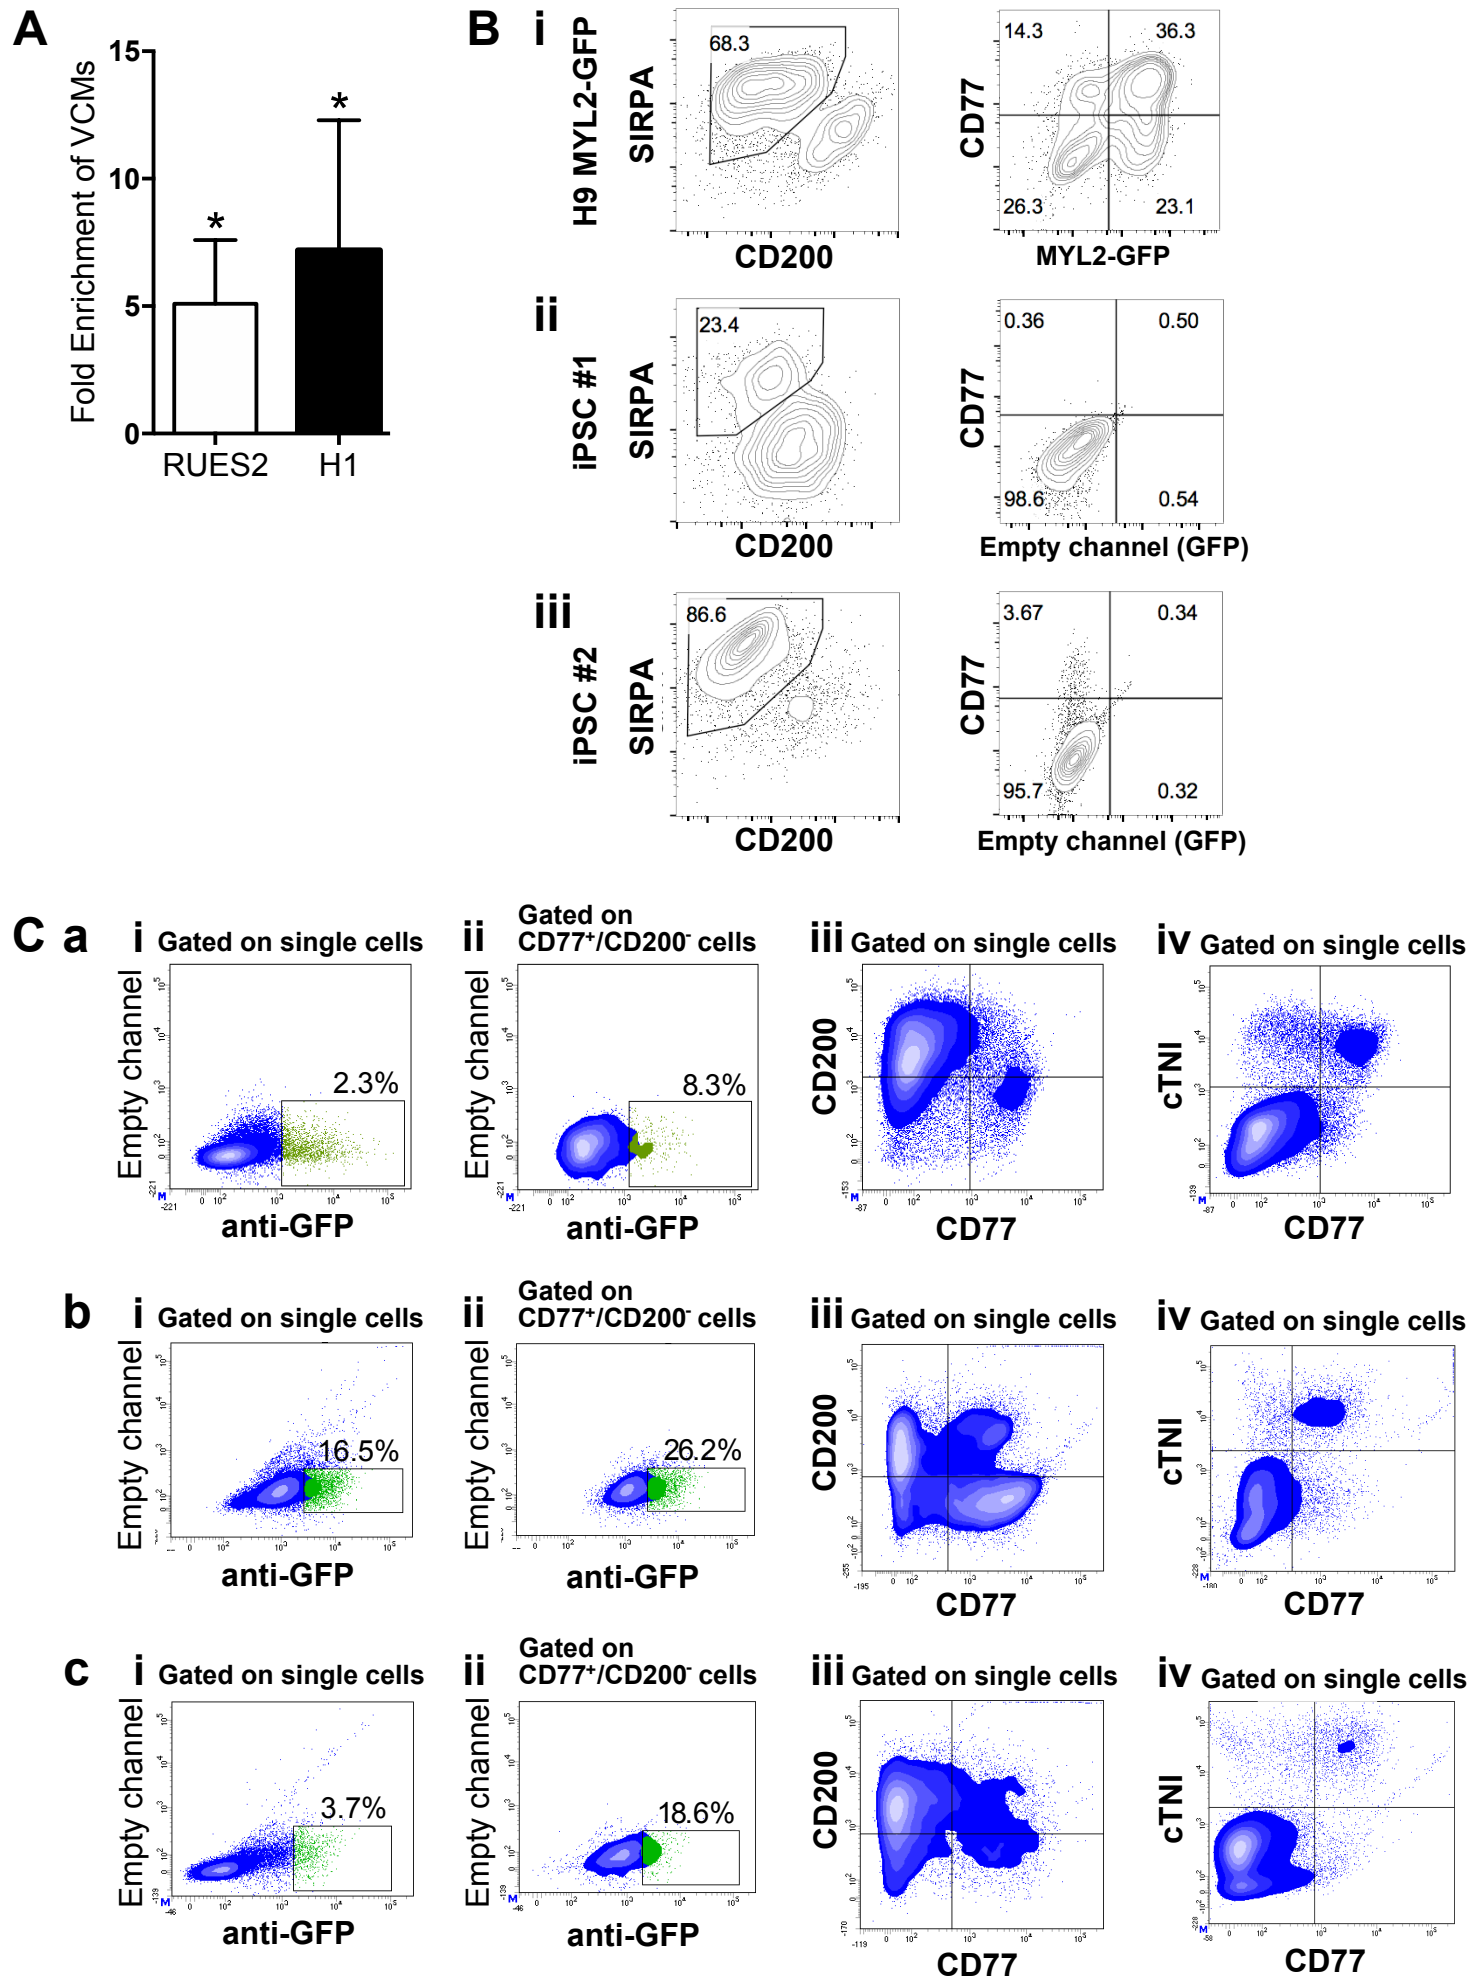



## Supplemental Figure Legends

### Figure S1. Verification of H9 MYL2-GFP BAC reporter line pluripotency and cardiac differentiation capacity. Related to Figure 1.

(A) Immunostaining for intracellular pluripotency markers NANOG (red), and OCT4 (green) in H9 MYL2-GFP BAC transgenic clone #3 hESCs. DNA stained with DAPI and merged images are shown. Scale bar, 25  $\mu$ m. Images are representative of a minimum of three independent clones.

(B) Flow cytometric assessment of the cell surface pluripotency marker TRA-1-60 in H9 MYL2-GFP BAC transgenic clone #3 hESCs. The fibroblast marker CD13 was used as a negative control. Isotype controls were used to define the cytometric gates. Data are representative of a minimum of three independent clones.

(C) Giemsa-banding chromosomal preparations of H9 MYL2-GFP BAC transgenic clone #3 demonstrate a normal karyotype. All clones analyzed demonstrated a normal karyotype after transfection.

(D) A schematic representation of the embryoid body (EB) cardiac differentiation protocol (modified from <sup>29</sup>). In brief, cell clusters were washed and cultured in 6-well ultra-low attachment plates (Corning) in 2 mL differentiation media (DM) consisting of StemPro®-34 serum-free media (SFM) (Thermo Fisher Scientific), supplemented with 2 mM L-glutamine (Thermo Fisher Scientific), 50  $\mu$ g/mL L-ascorbic acid (Sigma-Aldrich), 150  $\mu$ g/mL transferrin (Roche), and  $4 \times 10^{-4}$  M monothioglycerol (MTG) (Sigma-Aldrich), and containing 10 ng/mL bone morphogenetic protein 4 (BMP-4) (R&D Systems). Following 24 hours incubation, on day 1, cell aggregates were induced with the addition of 1 mL DM containing a final concentration of 10 ng/mL BMP-4, 5 ng/mL basic fibroblast growth factor (bFGF), and 3 ng/mL Activin A (R&D Systems). On day 3 and day 5, EBs were harvested and resuspended in DM supplemented with 150 ng/mL Dickkopf-related protein 1 (DKK-1), and 10 ng/mL vascular endothelial growth factor (VEGF) (R&D Systems). On days 8, 12 and 16, EBs were harvested and cultured in DM containing 5 ng/mL bFGF, and 10 ng/mL VEGF. On and after day 20, DM without additional factors was replaced every 4-5 days for the duration of the experiment.

(E) RT-qPCR analysis of cell preparations of H9 MYL2-GFP BAC transgenic clone #3 over time course of EB cardiac differentiation. Data were normalized to corresponding *ACTB* expression, and is relative to hESC-derived EBs at day 0. Gene expression in human 15-week fetal atrial and ventricular tissue and human adult atrial and ventricular tissue was normalized to *GAPDH*. Error bars, mean  $\pm$  SD (n=3 technical replicates). Data are representative of a minimum of three independent biological replicates.

(F) Flow cytometric quantification of MYL2-H2B-GFP (left column), cardiac troponin I (cTNI) (middle column), and MYL2-H2B-GFP/cTNI co-expression in three (samples 1-3) independent cardiac differentiation experiments of H9 MYL2-GFP hESCs at day 25 of differentiation.

### Figure S2. Flow cytometry cell gating strategy. Related to Figure 1 and Figure 2.

(A) Parental H9 and MYL2-GFP cells at day 25 of cardiac differentiation were used to define the gating strategy used throughout all flow cytometry experiments. Top panel: (i-ii) All events were first analyzed by forward (FSC) and size (SSC) scatter properties to exclude doublets. (iii) After gating on singlets, unstained H9 cells were analyzed for background signal to further discriminate autofluorescent debris. Single cells were then analyzed in (iv) H9 and (v) MYL2 differentiated cells for GFP expression.

(B) For the sorting of SIRPA<sup>+</sup>/GFP<sup>+</sup> and SIRPA<sup>+</sup>/GFP<sup>-</sup> cells, single cells were first analyzed for the expression of SIRPA. (i) An isotype control was used to draw the gates for the detection of (ii) SIRPA<sup>Bright</sup> (SIRPA<sup>+</sup>) cells. After gating of SIRPA<sup>+</sup> cells, (iii) GFP<sup>+</sup> and GFP<sup>-</sup> cells were sorted.

### Figure S3. Potential positive and negative cell-surface marker candidates to identify hESC-derived ventricular cardiomyocytes. Related to Figure 3.

Flow cytometric histogram plots of the highest ranked positive or negative cell-surface marker candidates within the MYL2-GFP<sup>+</sup> (GFP<sup>+</sup>) (green) and MYL2-GFP<sup>-</sup> (GFP<sup>-</sup>) (orange) populations. Median fluorescence intensity (MFI) ratio and percent (%) frequency of each marker on each cell population stained are detailed in the table below each plot.

**Figure S4. Multi-color validation by flow cytometric analysis of positive and negative cell-surface marker candidates to identify hESC-derived ventricular cardiomyocytes. Related to Figure 4.**

Cells were analyzed at day 25 of cardiac differentiation. Data are representative of a minimum of three independent biological replicates.

**(A)** Left panel: MYL2-GFP<sup>-</sup> (GFP<sup>-</sup>) and MYL2-GFP<sup>+</sup> (GFP<sup>+</sup>) cell populations were defined within single cells. Contour plots depict expression of CD77 together with other positive marker candidates, CD29 (middle panel); or CD340 (right panel) within the GFP<sup>-</sup> (orange) and GFP<sup>+</sup> (green) cell populations.

**(B)** The expression of CD77 (top panels) and CD200 (bottom panels) was analyzed within single cells in relation to negative marker candidates: CD31, CD49a, CD49b, CD90, CD140b, CD141, and EGFR.

**Figure S5. Temporal expression of cell-surface marker signature.**

Data are representative of a minimum of three independent biological replicates.

**(A)** MYL2-GFP expression was analyzed within single cells over the time course of embryoid body cardiac differentiation (Day 5-25). Numbers indicate the percentage of GFP<sup>+</sup> cells.

**(B-D)** The differential expression of (B) CD200 and CD77; (C) SIRPA and CD77; and (D) CD90 and CD77 was analyzed within single cells over the time course of cardiac differentiation (Day 5-25). Green dots: overlay of MYL2-GFP<sup>+</sup> cells.

**(E)** Immunofluorescence analysis of H9 hESC-derived VCAM1<sup>+</sup>-sorted cells after 12 days of cardiac differentiation. Cardiomyocytes were stained with cardiac troponin T (cTNT). No MYL2 expression was observed. DNA was stained with DAPI. Scale bar, 50  $\mu$ m.

**Figure S6. Enrichment of ventricular cardiomyocytes in human pluripotent stem cell lines and in monolayer cultures.**

**(A)** Cells derived from RUES2 and H1 hESCs at day 25 of cardiac differentiation (for specific differentiation conditions, see Supplemental Experimental Procedures) were sorted for CD77<sup>+</sup>/CD200<sup>-</sup> and analyzed for MYL2 expression. Following the sort, the percentage of cells expressing MYL2 was normalized to percentage of cells expressing MYL2 prior to sorting, and expressed as fold-enrichment for ventricular cardiomyocytes (VCMs). Error bars, mean  $\pm$  SD. \* $P \leq 0.05$  by paired  $t$ -test ( $n=3$  independent biological replicates).

**(B)** Cells derived from (i) H9 MYL2-GFP hESCs, (ii) human induced pluripotent stem cell (iPSC) line 1 (#1), and (iii) human iPSC line 2 (#2) at day 25 of cardiac differentiation were first analyzed for the expression of SIRPA and absence of CD200 (left plot). After gating of SIRPA<sup>+</sup>/CD200<sup>-</sup> cells, putative cardiomyocyte populations were subsequently analyzed for the expression of CD77 (right plot). Data are representative of a minimum of three independent biological replicates.

**(C)** Multicolor flow cytometry was used to simultaneously analyze the expression of (i-ii) MYL2-GFP (anti-GFP), (iii) surface markers CD77 and CD200, and (iv) CD77 and the intracellular cardiomyocyte marker, cardiac troponin I (cTNI) at day 60 of monolayer differentiation in three (a, b, and c) independent experiments.

## Supplemental Tables

**Table S1. (Excel File)**

**Heat map depicting the results from the cell-surface marker screen. Related to Figure 3.**

Heat map detailing the expression of 242 cell-surface markers on MYL2-GFP<sup>+</sup> (GFP<sup>+</sup>) and MYL2-GFP<sup>-</sup> (GFP<sup>-</sup>) cell populations generated from the H9 MYL2-GFP reporter cell line after 25 days of cardiac differentiation. Markers are plotted by their median fluorescence intensity (MFI) ratio, and percent (%) frequency on each cell population stained with individual antibodies (BD Biosciences Lyoplate™ Human Cell Surface Marker Screening Panel). Isotype controls were used to normalize the MFI values and to draw the gates for proper discrimination between positive and negative cells.

**Table S2. Primer sequences used for RT-qPCR analysis.**

| Gene          | Forward Primer (5'-3')  | Reverse Primer (5'-3')  |
|---------------|-------------------------|-------------------------|
| <i>ACTB</i>   | CTCACCATGGATGATGATATCGC | AGGAATCCTTCTGACCCATGC   |
| <i>GAPDH</i>  | GGAGCGAGATCCCTCCAAAAT   | GGCTGTTGTCATACTTCTCATGG |
| <i>GJA5</i>   | ATCACACCGGAAATCAGCCTG   | CCGTGGTAGGCAAGGTCTG     |
| <i>ISL1</i>   | GACGGTGGCTTACAGGCTAA    | CAGTGGAATTAGAGCCCGGT    |
| <i>MYH6</i>   | GCCCTTTGACATTGCACTG     | GGTTTCAGCAATGACCTTGCC   |
| <i>MYH7</i>   | CTTTGCTGTTATTGCAGCCATT  | AGATGCCAACTTTCCTGTTGC   |
| <i>MYL2</i>   | TTGGGCGAGTGAACGTGAAAA   | CCGAACGTAATCAGCCTTCAG   |
| <i>MYL7</i>   | TTCACCGTCTTCCTCACGCT    | CATGGGTGTCAGGGCGAAC     |
| <i>NKX2-5</i> | TATCCACGTGCCTACAGCGA    | GTTGTCCGCCTCTGTCTTCT    |
| <i>NPPA</i>   | CAACGCAGACCTGATGGATTT   | AGCCCCCGCTTCTTCATTC     |
| <i>T</i>      | AGACCCAGTTCATAGCGGTG    | GGCACCTCCAAACTGAGGAT    |
| <i>TNNI3</i>  | CCTCACTGACCCTCCAAACG    | GCATAAGCGCGGTAGTTGGA    |
| <i>TNNT2</i>  | GTGGGAAGAGGCAGACTGAG    | ATAGATGCTCTGCCACAGC     |

**Table S3. Antibodies used for flow cytometry.**

| Marker | Isotype                 | Clone | Fluorochrome | Manufacturer   | Cat. No. |
|--------|-------------------------|-------|--------------|----------------|----------|
| CD29   | Mouse IgG <sub>1</sub>  | MAR4  | PE           | BD Biosciences | 555443   |
| CD31   | Mouse IgG <sub>1</sub>  | WM59  | BV605        | BD Biosciences | 562855   |
| CD49a  | Mouse IgG <sub>1</sub>  | SR84  | PE           | BD Biosciences | 559596   |
| CD49b  | Mouse IgG <sub>2a</sub> | 12F1  | PE           | BD Biosciences | 555669   |
| CD77   | Mouse IgM               | 5B5   | BV510        | BD Biosciences | 563630   |
| CD77   | Mouse IgM               | 5B5   | PE-CF594     | BD Biosciences | 563631   |

|                                              |                            |            |                         |                                           |                        |
|----------------------------------------------|----------------------------|------------|-------------------------|-------------------------------------------|------------------------|
| <b>CD90</b>                                  | Mouse IgG <sub>1</sub>     | 5E10       | BV421                   | BD Biosciences                            | 562556                 |
| <b>CD140b</b>                                | Mouse IgG <sub>2a</sub>    | 28D4       | PE                      | BD Biosciences                            | 558821                 |
| <b>CD141</b>                                 | Mouse IgG <sub>1</sub>     | 1A4        | PE                      | BD Biosciences                            | 559781                 |
| <b>CD172a/b (SIRPA)</b>                      | Mouse IgG <sub>1</sub>     | SE5A5      | PE                      | BD Biosciences                            | 563441                 |
| <b>CD200</b>                                 | Mouse IgG <sub>1</sub>     | MRC OX-104 | PE-Cy7                  | BD Biosciences                            | 562125                 |
| <b>CD340</b>                                 | Mouse IgG <sub>1</sub>     | Neu 24.7   | APC                     | BD Biosciences                            | 340554                 |
| <b>EGFR</b>                                  | Mouse IgG <sub>2b</sub>    | EGFR.1     | PE                      | BD Biosciences                            | 555997                 |
| <b>cTNI</b>                                  | Mouse IgG <sub>2b</sub>    | C5         | Alexa Fluor® 647        | BD Biosciences                            | 564409                 |
| <b>VCAM1</b>                                 | Mouse IgG <sub>1</sub>     | STA        | PE                      | BioLegend                                 | 305805                 |
| <b>MYL2 (Secondary)</b>                      | Rabbit IgG<br>(Donkey IgG) | -<br>-     | -<br>(Alexa Fluor® 488) | Proteintech<br>(Thermo Fisher Scientific) | 10906-1-AP<br>(R37118) |
| <b>Mouse IgG<sub>1</sub> Isotype Control</b> | -                          | MOPC-21    | PE                      | BD Biosciences                            | 555749                 |
| <b>Mouse IgG<sub>1</sub> Isotype Control</b> | -                          | MOPC-21    | PE-Cy7                  | BD Biosciences                            | 557872                 |

## Supplemental Movie

### Supplemental Movie 1.

#### Embryoid bodies derived from H9 MYL2-GFP hESCs. Related to Figure 1.

Epifluorescence analysis of embryoid bodies (EBs) derived from H9 MYL2-GFP hESCs, at day 25 of cardiac differentiation, confirmed nuclear GFP expression in cells throughout the EBs.

## Supplemental Experimental Procedures

### Pluripotent properties of H9 MYL2-GFP BAC transgenic clones

To verify that the transgenic hESC clones generated retained the unique properties of the parental H9 hESC line, undifferentiated hESCs were stained by immunocytochemistry for specific hESC markers NANOG (1:100 anti-NANOG Alexa Fluor® 647; BD Biosciences, 561300) and OCT4 (1:100 anti-OCT4 Alexa Fluor® 488; BD Biosciences, 561628), and flow cytometry for CD13 (anti-CD13 PerCP-Cy<sup>TM</sup>5.5; BD Biosciences, 562626) and TRA-1-60 (anti-TRA-1-60 PE; BD Biosciences, 562626), as detailed in Experimental Procedures.

### Maintenance and cardiac differentiation of human pluripotent stem cell (hPSC) lines

RUES2 and H1 control hESCs, and control iPSC lines were maintained on Matrigel<sup>TM</sup>-coated tissue culture plates in irradiated mouse embryonic fibroblast (MEF) (GlobalStem)-conditioned hESC media consisting of DMEM/F-12 supplemented with 20% (v/v) KnockOut<sup>TM</sup> Serum Replacement, 100  $\mu$ M non-essential amino acids, 2 mM L-glutamine, 55  $\mu$ M  $\beta$ -mercaptoethanol (all from Thermo Fisher Scientific), and 20 ng/mL human basic fibroblast growth factor (bFGF) (PeproTech). Cells were passaged as small colonies, following dissociation with 1 mg/mL dispase (Thermo Fisher Scientific).

Prior to differentiation, hPSCs were cultured on MEFs in hESC media for 2-3 days to 90% confluence. Embryoid bodies (EBs) were differentiated to the cardiovascular lineage as described for hESCs in Experimental Procedures and Figure S1D. In brief, EBs were generated by dissecting hESC colonies into small clusters using an EZPassage<sup>TM</sup> Stem Cell Passaging Tool (Thermo Fisher Scientific), which were collected by gentle scraping. Cell clusters were washed and cultured in 6-well ultra-low attachment plates (Corning) in 2 mL differentiation media (DM) consisting of StemPro<sup>®</sup>-34 serum-free media (SFM) (Thermo Fisher Scientific), supplemented with 2 mM L-glutamine (Thermo Fisher Scientific), 50  $\mu$ g/mL L-ascorbic acid (Sigma-Aldrich), 150  $\mu$ g/mL transferrin (Roche), and  $4 \times 10^{-4}$  M monothioglycerol (MTG) (Sigma-Aldrich), and containing 10 ng/mL bone morphogenetic protein 4 (BMP-4) (R&D Systems). Following 24 hours incubation, on day 1, cell aggregates were induced with the addition of 1 mL DM containing a final concentration of 10 ng/mL BMP-4, 5 ng/mL bFGF, and 3 ng/mL Activin A (R&D Systems). On day 3 and day 5, EBs were harvested and resuspended in DM supplemented with 150 ng/mL Dickkopf-related protein 1 (DKK-1), and 10 ng/mL vascular endothelial growth factor (VEGF) (R&D Systems). On days 8, 12 and 16, EBs were harvested and cultured in DM containing 5 ng/mL bFGF, and 10 ng/mL VEGF. On and after day 20, DM without additional factors was replaced every 4-5 days for the duration of the experiment.

On day 25 of cardiac differentiation, EBs generated from hPSC differentiation experiments were harvested and dissociated to single cells. Briefly, EBs were washed and incubated in dissociation solution consisting of 1 mg/mL collagenase type II (Worthington) in Hank's balanced salt solution (Corning) (Formulation: 5.36 mM KCl; 0.44 mM KH<sub>2</sub>PO<sub>4</sub>; 136 mM NaCl; 0.39 mM Na<sub>2</sub>HPO<sub>4</sub>; 4.16 mM NaHCO<sub>3</sub>; 5.55 mM D-glucose) with 5 mM HEPES (Corning), overnight at room temperature with gentle shaking. On the following day, an equal amount of dissociation solution supplemented with 1 mg/mL bovine serum albumin (Thermo Fisher Scientific), 0.1 mM EGTA (Sigma-Aldrich), and 10 mM taurine (Sigma-Aldrich) was added to the cell suspension, and EBs were pipetted gently to dissociate the cells. After dissociation, cells were centrifuged (200  $\times$  g for 5 minutes), filtered (100  $\mu$ m cell strainer) and used for analysis.

### Cardiac differentiation of hESCs by monolayer culture

H9 MYL2-GFP hESCs were maintained in Essential 8 (E8) media, split at 1:10 or 1:12 ratios using 0.5 M EDTA, and grown for 4 days (~85% confluence) prior to cardiac differentiation as previously described<sup>14</sup>. In brief, medium was changed to RPMI 1640 with L-Glutamine (Thermo Fisher Scientific), supplemented with 500  $\mu$ g/mL recombinant human albumin (Sigma-Aldrich), and 213  $\mu$ g/mL L-ascorbic acid (Sigma-Aldrich). On days 0-2, medium was supplemented with 6  $\mu$ M CHIR99021 (Selleck). On day 3, medium was supplemented with 5  $\mu$ M IWR-1 (Sigma-Aldrich). On and after day 5, differentiation media without additional factors was replaced every 48 hours for the duration of the experiment. At

indicated time points, cells were dissociated with TryPLE Express and used for multi-color flow cytometry. As the MYL2-GFP signal was weak following monolayer differentiation, an anti-GFP antibody was needed to detect MYL2-GFP<sup>+</sup> cells.
